# Supplementary material
Source: publisher site journal article supplement (https://www.spandidos-publications.com/8266/downloadSupplementary)
Supplement: Supplementary file 1 [file downloadSupplementary]

Table SI. Selected studies representing NETs (n=22). Summary of the included studies, detailing sample size, patient demographics, tumour type, treatment regimen, treatment duration, key findings, survival outcomes (PFS and OS), and principal study limitations.

| First author (year) | Number of patients | Median age, years (min., max. or range) | Male, % | PICO framework                                                                                                                                                                                                                                                                   | Tumour                                                                                                        |                                                               | Treatment                                          |                                                                                        | Key findings                                                                                                                                                                                                                              | Survival rates                                                                                                    | Limitations                                                                                                                         | (Refs.) |
|---------------------|--------------------|-----------------------------------------|---------|----------------------------------------------------------------------------------------------------------------------------------------------------------------------------------------------------------------------------------------------------------------------------------|---------------------------------------------------------------------------------------------------------------|---------------------------------------------------------------|----------------------------------------------------|----------------------------------------------------------------------------------------|-------------------------------------------------------------------------------------------------------------------------------------------------------------------------------------------------------------------------------------------|-------------------------------------------------------------------------------------------------------------------|-------------------------------------------------------------------------------------------------------------------------------------|---------|
|                     |                    |                                         |         |                                                                                                                                                                                                                                                                                  | Site                                                                                                          | Type                                                          | Type                                               | Duration                                                                               |                                                                                                                                                                                                                                           |                                                                                                                   |                                                                                                                                     |         |
| Patel (2020)        | 32                 | 60.5 (36, 81)                           | 59%     | <p><i>Population:</i> Patients with NETs that had at least one line of standard systemic therapy</p> <p><i>Intervention:</i> Dual checkpoint inhibitors (DCI)-NIVO and IPI</p> <p><i>Comparison:</i> With standard treatment</p> <p><i>Outcome:</i> Determine the PFS and OS</p> | Gastrointestinal; lung                                                                                        | 56% with high-grade carcinoma                                 | IPI plus NIVO                                      | NIVO 240 mg IV every 2 weeks and IPI 1 mg/kg IV every 6 weeks on a continuous schedule | Improved PFS and OS with dual blockade; manageable toxicity profile                                                                                                                                                                       | Median OS was 11 months, 95% confidence interval (6,∞), 16 adverse events for tumours grade 3-5                   | Small sample size; limited generalizability                                                                                         | (41)    |
| Marabelle (2019)    | 233                | 60 (20, 87)                             | 41.2%   | <p><i>Population:</i> Patients with incurable non-colorectal solid tumours with disease progression on/or intolerance to prior standard therapy</p> <p><i>Intervention:</i> Pembrolizumab</p> <p><i>Comparison:</i> None</p> <p><i>Outcome:</i> Determine the PFS and OS</p>     | Non-colorectal cancer (endometrial, gastric, cholangiocarcinoma, pancreatic, small intestine, ovarian, brain) | Disease stage: MX (0.4%); M0 (4.3%); M1 (91%); Unknown (4.3%) | Anti-programmed death-1 therapy with pembrolizumab | Pembrolizumab 200 mg once every three weeks for 35 cycles, approximately two years     | In most tumour types, there were reductions in target lesion diameters (with almost 50% of the patients having experienced 30% or greater reductions from baseline). Patients with endometrial cancer had particularly positive outcomes, | The median PFS was 4.1 months, and the median OS was 23.5 months; data are not available for the number of deaths | 63.8% of patients had treatment-related adverse events; no control group; possible selection bias as this is a 23 multicentre study | (42)    |

|              |                          |               |       |                                                                                                                                                                                                          |          |                                                                                                                                                                                     |                         |                                                          |                                                                                |                                                                                                                                                                 |                                                          |      |
|--------------|--------------------------|---------------|-------|----------------------------------------------------------------------------------------------------------------------------------------------------------------------------------------------------------|----------|-------------------------------------------------------------------------------------------------------------------------------------------------------------------------------------|-------------------------|----------------------------------------------------------|--------------------------------------------------------------------------------|-----------------------------------------------------------------------------------------------------------------------------------------------------------------|----------------------------------------------------------|------|
|              |                          |               |       |                                                                                                                                                                                                          |          |                                                                                                                                                                                     |                         |                                                          | with 70% experiencing a tumour size reduction of 30% or more                   |                                                                                                                                                                 |                                                          |      |
| Tawbi (2022) | 714                      | 63.0 (20-94)  | 59.3% | <p><i>Population:</i> Adults with advanced melanoma</p> <p><i>Intervention:</i> Dual therapy: Relatlimab and NIVO</p> <p><i>Comparison:</i> NIVO alone</p> <p><i>Outcome:</i> Determine the PFS</p>      | Skin     | Unresectable stage III or IV melanoma                                                                                                                                               | Relatlimab and NIVO     | 5.6 months with Relatlimab-NIVO and 4.9 months with NIVO | Significant improvement in PFS with dual therapy as compared to single therapy | The median PFS was 10.1 months (dual therapy) vs. 4.6 months (NIVO); OS data not available; 3 deaths in the dual therapy group and two deaths in the NIVO group | High cost of treatment; limited long-term data available | (43) |
| Puca (2019)  | 228 (only the IHC group) | Not available | 100%  | <p><i>Population:</i> Patients with neuroendocrine prostate cancer</p> <p><i>Intervention:</i> Targeted therapy based on DLL3-rovalpituzumab tesirine</p> <p><i>Comparison:</i> Conventional therapy</p> | Prostate | Benign prostate tissue; prostate adenocarcinoma; castration-resistant prostate adenocarcinoma; high-grade prostate cancer with neuroendocrine differentiation; small cell carcinoma | Rovalpituzumab tesirine | Continuous until progression or unacceptable toxicity    | Promising efficacy in targeting DLL3; potential new treatment avenue           | DLL3 expression was associated with worse OS compared to DLL3-negative cases (35 months vs. 81.5)                                                               | Early-phase trial                                        | (44) |

|               |     |            |     |                                                                                                                                                                                                           |      |                                                                      |              |            |                                                            |                                                                                                                                                                                                                                 |                                |      |
|---------------|-----|------------|-----|-----------------------------------------------------------------------------------------------------------------------------------------------------------------------------------------------------------|------|----------------------------------------------------------------------|--------------|------------|------------------------------------------------------------|---------------------------------------------------------------------------------------------------------------------------------------------------------------------------------------------------------------------------------|--------------------------------|------|
|               |     |            |     | <p><i>Outcome:</i> Whether DLL3 expression is associated with the CRPC-NE phenotype in prostate cancer and to evaluate the antitumour activity of SC16LD6.5 in DLL3-expressing prostate cancer models</p> |      |                                                                      |              |            |                                                            | months); no data available for PFS and number of deaths                                                                                                                                                                         |                                |      |
| Larkin (2019) | 945 | 61 (18-88) | 66% | <p><i>Population:</i> Adults with advanced melanoma<br/> <i>Intervention:</i> DCI-NIVO and IPI<br/> <i>Comparison:</i> Monotherapy with NIVO or IPI<br/> <i>Outcome:</i> Determine the OS</p>             | Skin | Stage III or stage IV melanoma, with known BRAF V600 mutation status | NIVO and IPI | Five years | DCI improved 5-year survival rates compared to monotherapy | In the DCI group, the median OS was 60.0 months, the median PFS 11.5 months and there were 53 deaths; in the NIVO group, the median OS was 36.9 months, the median PFS 6.9 months, and there were 45 deaths; compared with 19.9 | High toxicity rates; high cost | (45) |

|                 |     |            |       |                                                                                                                                                                                                                                          |                                    |                                                                                              |                                                      |                                                                                                                          |                                                                                                                                                                                    |                                                                                                                                                |                                                    |      |
|-----------------|-----|------------|-------|------------------------------------------------------------------------------------------------------------------------------------------------------------------------------------------------------------------------------------------|------------------------------------|----------------------------------------------------------------------------------------------|------------------------------------------------------|--------------------------------------------------------------------------------------------------------------------------|------------------------------------------------------------------------------------------------------------------------------------------------------------------------------------|------------------------------------------------------------------------------------------------------------------------------------------------|----------------------------------------------------|------|
|                 |     |            |       |                                                                                                                                                                                                                                          |                                    |                                                                                              |                                                      |                                                                                                                          |                                                                                                                                                                                    | months, 2.9 months and 57 deaths respectively in the IPI group                                                                                 |                                                    |      |
| Jonasch (2021)  | 61  | 41 (19-66) | 52%   | <i>Population:</i> Adults with VHL-associated renal cell carcinoma<br><i>Intervention:</i> Belzutifan<br><i>Comparison:</i> Standard treatment<br><i>Outcome:</i> Determine tumour shrinkage and PFS rate                                | Kidney                             | Renal cell carcinoma (von Hippel-Lindau disease) tumour $\geq 10$ mm in the longest diameter | Belzutifan                                           | 120 mg administered orally per day until progression or unacceptable toxicity                                            | Belzutifan showed significant efficacy in reducing tumour size and delaying progression                                                                                            | Median OS was not reached; no data was available for PFS; 1 patient died, but it was considered to be unrelated to the trial drug              | Limited to patients with von Hippel-Lindau disease | (46) |
| Morizane (2022) | 170 | 64 (29-75) | 68.8% | <i>Population:</i> Adults with neuroendocrine carcinoma<br><i>Intervention:</i> Etoposide and Cisplatin vs. Irinotecan and Cisplatin<br><i>Comparison:</i> Treatment regimens<br><i>Outcome:</i> Determine the OS and treatment response | Various (including lung, GI tract) | Advanced neuroendocrine carcinoma of the digestive system                                    | Etoposide and Cisplatin vs. Irinotecan and Cisplatin | In the EP arm, etoposide was administered every three weeks; in the IP arm, irinotecan was administered every four weeks | Both EP and IP therapy remain standard first-line chemotherapy options. No significant difference in overall survival between the two regimens, but different side effect profiles | The median OS was 12.5 months in the EP arm vs. 10.9 months in the IP arm. The 1-year survival was 52.1% in the EP arm and 41.8% in the IP arm | Retrospective design; potential for bias           | (47) |

|               |       |            |       |                                                                                                                                                                                                                            |                                    |                                                   |                                                                                                                                           |                                                                                                                                             |                                                                                                                                                                                                                                                                                                                                          |                                                                                                                            |                                                                                      |      |
|---------------|-------|------------|-------|----------------------------------------------------------------------------------------------------------------------------------------------------------------------------------------------------------------------------|------------------------------------|---------------------------------------------------|-------------------------------------------------------------------------------------------------------------------------------------------|---------------------------------------------------------------------------------------------------------------------------------------------|------------------------------------------------------------------------------------------------------------------------------------------------------------------------------------------------------------------------------------------------------------------------------------------------------------------------------------------|----------------------------------------------------------------------------------------------------------------------------|--------------------------------------------------------------------------------------|------|
| Amaria (2018) | 23    | 55 (34-73) | 75%   | <p><i>Population:</i> Adults with high-risk melanoma</p> <p><i>Intervention:</i> Neoadjuvant immune checkpoint blockade</p> <p><i>Comparison:</i> Adjuvant therapy</p> <p><i>Outcome:</i> Recurrence-free survival, OS</p> | Skin                               | Clinical stage IIIB or IIIC of high-risk melanoma | Neoadjuvant immune checkpoint blockade                                                                                                    | Median of 15.0 months in the NIVO monotherapy arm and 15.6 months in the combination therapy arm                                            | Neoadjuvant therapy led to higher rates of recurrence-free survival compared to adjuvant therapy                                                                                                                                                                                                                                         | 2-year OS 15.6 months                                                                                                      | Small sample size; single-centre study                                               | (48) |
| Motzer (2022) | 1,096 | 64.6       | 73.7% | <p><i>Population:</i> Patients with untreated advanced renal cell carcinoma</p> <p><i>Intervention:</i> NIVO plus IPI; NIVO or SUN</p> <p><i>Comparison:</i> SUN</p> <p><i>Outcome:</i> OS and PFS</p>                     | Kidney                             | Advanced renal cell carcinoma                     | NIVO, then patients were separated into two groups, first group continued treatment with NIVO as monotherapy, second group changed to SUN | NIVO (3 mg/kg) plus IPI (1 mg/kg) every three weeks for four cycles, then either NIVO monotherapy or SUN (50 mg) daily (four 6-week cycles) | Durable clinical benefits were observed with NIVO + IPI versus SUN at five years, the most extended phase 3 follow-up for a first-line checkpoint inhibitor-based combination in patients with aRCC. Conditional estimates indicate that most patients who remained alive or in response to NIVO + IPI at 3 years remained so at 5 years | OS median, 55.7 vs. 38.4 months; PFS median, 12.3 vs. 12.3 months; and objective response, 39.3 vs. 32.4%. (n=550 vs. 546) | Imbalances in clinical characteristics for survivors, potentially affecting outcomes | (49) |
| Ott (2020)    | 82    | 60         | 68%   | <p><i>Population:</i> Patients with unresectable or metastatic</p>                                                                                                                                                         | Various (including NETs, melanoma) | Multiple solid tumours                            | Combination of immunotherapy and vaccine                                                                                                  | 12 months                                                                                                                                   | The personalized neoantigen vaccine Neo-PV-01 plus                                                                                                                                                                                                                                                                                       | The median OS for vaccinated                                                                                               | Single-arm design; no NIVO                                                           | (50) |

|               |     |            |     |                                                                                                                                                                                                                                                                                      |      |                                                                |                                                                                                             |           |                                                                                                                                                                                                                                                                     |                                                                                                                                                                                                                                                    |                                                                                                                                                |      |
|---------------|-----|------------|-----|--------------------------------------------------------------------------------------------------------------------------------------------------------------------------------------------------------------------------------------------------------------------------------------|------|----------------------------------------------------------------|-------------------------------------------------------------------------------------------------------------|-----------|---------------------------------------------------------------------------------------------------------------------------------------------------------------------------------------------------------------------------------------------------------------------|----------------------------------------------------------------------------------------------------------------------------------------------------------------------------------------------------------------------------------------------------|------------------------------------------------------------------------------------------------------------------------------------------------|------|
|               |     |            |     | <p>melanoma, smoking-associated NSCLC, and TCC of the bladder</p> <p><i>Intervention:</i> NEO-PV-01 and NIVO</p> <p><i>Comparison:</i> Vaccinated vs. unvaccinated patients</p> <p><i>Outcome:</i> To evaluate the safety and tolerability of NEO-PV-01 in combination with NIVO</p> |      |                                                                |                                                                                                             |           | <p>NIVO is feasible and safe. NEO-PV-01 plus NIVO stimulates durable neoantigen-specific T-cell reactivity. NEO-PV-01-specific T cells have cytotoxic potential</p> <p>NEO-PV-01 induces epitope spreading consistent with vaccine-mediated tumour cytotoxicity</p> | <p>patients was not reached in the melanoma and NSCLC cohorts, while the median OS for the bladder cancer cohort was 20.7 months.</p> <p>The 1-year OS rates for melanoma, NSCLC and bladder cancer patients were 96, 83 and 67%, respectively</p> | <p>monotherapy comparison cohort, significant pathologic responses observed after vaccination cannot definitively be linked to the vaccine</p> |      |
| Dummer (2020) | 870 | 50 (18-89) | 56% | <p><i>Population:</i> Patients with resected stage III melanoma with BRAF V600E or V600K mutations</p> <p><i>Intervention:</i> Dabrafenib plus trametinib</p> <p><i>Comparison:</i> With placebo</p>                                                                                 | Skin | Resected stage III melanoma with BRAF V600E or V600K mutations | Oral dabrafenib (at a dose of 150 mg twice daily) plus trametinib (2 mg once daily) or two matched placebos | 12 months | Dabrafenib plus trametinib improved OS compared to standard therapy. At five years, 52% of patients on dabrafenib plus trametinib were alive without relapse and 65% without                                                                                        | OS was not analysed since the required number of events to trigger the final OS analysis had                                                                                                                                                       | OS rate may be affected by the 47% of patients who also received anticancer therapy. Updated safety analyses were not performed                | (51) |

|                  |     |            |     |                                                                                                                                                                                               |                                        |                                                                    |                               |                                                                                                                                       |                                                                                                    |                                                                                                                |                                                                                                                                                                                                                 |      |
|------------------|-----|------------|-----|-----------------------------------------------------------------------------------------------------------------------------------------------------------------------------------------------|----------------------------------------|--------------------------------------------------------------------|-------------------------------|---------------------------------------------------------------------------------------------------------------------------------------|----------------------------------------------------------------------------------------------------|----------------------------------------------------------------------------------------------------------------|-----------------------------------------------------------------------------------------------------------------------------------------------------------------------------------------------------------------|------|
|                  |     |            |     | <i>Outcome:</i> To evaluate relapse-free survival                                                                                                                                             |                                        |                                                                    |                               |                                                                                                                                       | distant metastasis, as compared with 36% with placebo treatment and 54% without distant metastasis | not been reached                                                                                               | at this data cutoff because no patients continued to receive therapy during the extended follow-up period, and reporting treatment-related adverse events after that point was at the investigator's discretion |      |
| Eggermont (2018) | 45  | 66 (50-86) | 56% | <i>Population:</i> Patients with extensive-stage SCLC<br><i>Intervention:</i> Pembrolizumab<br><i>Comparison:</i> Chemotherapy<br><i>Outcome:</i> Overall survival, progression-free survival | Lung                                   | SCLC                                                               | Pembrolizumab                 | Pembrolizumab 200 mg intravenously every three weeks was initiated within eight weeks of the last cycle of chemotherapy for two years | Pembrolizumab improved overall survival compared to chemotherapy alone                             | The median PFS was 1.4 months, with a 1-year PFS of 13%. The median OS was 9.6 months, with a 1-year OS of 37% | A single-arm study cannot determine whether a biomarker has prognostic or predictive utility; none of the observed differences were statistically significant                                                   | (52) |
| Taylor (2020)    | 137 | 65 (31-87) | 61% | <i>Population:</i> Patients with progressive NETs<br><i>Intervention:</i>                                                                                                                     | Various (including pancreas, GI tract) | Metastatic renal cell carcinoma, endometrial cancer, squamous cell | Lenvatinib plus pembrolizumab | 200 mg intravenously every three weeks                                                                                                | Lenvatinib plus pembrolizumab demonstrated a manageable safety                                     | ORR week 24 was as follows: RCC, 63%;                                                                          | Small sample size, a heterogeneous patient                                                                                                                                                                      | (53) |

|                |    |            |     |                                                                                                                                                                                                                                                                                                                                                           |                                     |                                                                                            |                                                                                                                                           |                                             |                                                                                                                                        |                                                                                            |                                                                                                       |      |
|----------------|----|------------|-----|-----------------------------------------------------------------------------------------------------------------------------------------------------------------------------------------------------------------------------------------------------------------------------------------------------------------------------------------------------------|-------------------------------------|--------------------------------------------------------------------------------------------|-------------------------------------------------------------------------------------------------------------------------------------------|---------------------------------------------|----------------------------------------------------------------------------------------------------------------------------------------|--------------------------------------------------------------------------------------------|-------------------------------------------------------------------------------------------------------|------|
|                |    |            |     | Lenvatinib plus Pembrolizumab<br><i>Comparison:</i> None<br><i>Outcome:</i> PFR, OS                                                                                                                                                                                                                                                                       |                                     | carcinoma of the head and neck, melanoma, non-small-cell lung cancer, or urothelial cancer |                                                                                                                                           |                                             | profile and promising antitumour activity in patients with selected solid tumour types                                                 | endometrial cancer, 52%; melanoma, 48%; SCCHN, 36%; NSCLC, 33%; and urothelial cancer, 25% | population that was not randomly assigned, and the lack of a comparator treatment arm                 |      |
| Olson (2021)   | 70 | 64 (27-87) | 67% | <i>Population:</i> Patients with advanced melanoma who had progressed on anti-PD-1/L1 antibody as immediate prior therapy<br><i>Intervention:</i> Pembrolizumab plus low-dose IPI<br><i>Comparison:</i> With placebo<br><i>Outcome:</i> To determine the ORR of pembrolizumab with low-dose IPI following initial progression on an anti-PD-1/L1 antibody | Skin                                | Advanced melanoma                                                                          | Pembrolizumab 200 mg plus IPI 1 mg/kg once every three weeks for four doses, followed by pembrolizumab monotherapy once every three weeks | Two years                                   | Pembrolizumab plus low-dose IPI after anti-PD-1/L1 immunotherapy failure demonstrates significant antitumour activity and tolerability | The median PFS was 5.0 months, and the median OS was 24.7 months                           | There is no formal consensus to define progression on an anti-PD-1/L1 antibody as it exists currently | (54) |
| Chauhan (2018) | 56 | 62         | 50% | <i>Population:</i> Patients with advanced NETs                                                                                                                                                                                                                                                                                                            | Pancreas, small bowel, lung, rectum | NETs                                                                                       | CAPTEM                                                                                                                                    | 1,500 mg/m <sup>2</sup><br>Capecitabine was | CAPTEM regimen showed efficacy in                                                                                                      | Median PFS on CAPTEM                                                                       | Small sample size, missing data, and a                                                                | (55) |

|                 |    |              |       |                                                                                                                                                                                                                                   |                                          |                       |              |                                                                                                                                          |                                                                                                                                                                                             |                                                                                                                                                 |                                                                                                                                         |      |
|-----------------|----|--------------|-------|-----------------------------------------------------------------------------------------------------------------------------------------------------------------------------------------------------------------------------------|------------------------------------------|-----------------------|--------------|------------------------------------------------------------------------------------------------------------------------------------------|---------------------------------------------------------------------------------------------------------------------------------------------------------------------------------------------|-------------------------------------------------------------------------------------------------------------------------------------------------|-----------------------------------------------------------------------------------------------------------------------------------------|------|
|                 |    |              |       | <i>Intervention:</i><br>CAPTEM<br><i>Comparison:</i> Other chemotherapy regimens<br><i>Outcome:</i><br>OS, PFS                                                                                                                    |                                          |                       |              | administered continuously from days 1 to 14 daily in two divided doses. Temozolomide was administered on days 10-14 in two divided doses | treating advanced NETs                                                                                                                                                                      | in grade II and grade III NET of unknown primary was 10.8 and 7 months, respectively                                                            | nonrandomized patient population                                                                                                        |      |
| Topalian (2020) | 39 | 68 (22, 88)  | 64.1% | <i>Population:</i> Patients with stage IIA-IV resectable MCC<br><i>Intervention:</i> 1 NIVO dose<br><i>Comparison:</i> Placebo<br><i>Outcome:</i> To evaluate the safety and potential efficacy of NIVO (anti-programmed death-1) | Skin                                     | Merkel cell carcinoma | NIVO         | Patients received NIVO 240 mg intravenously on days 1 and 15 and underwent surgery on day 29 ( $\pm 7$ days)                             | NIVO administered approximately four weeks before surgery in MCC was generally tolerable and induced pCRs and radiographic tumour regressions in approximately one-half of treated patients | Thirty-nine treated patients did not reach median OS; at 12 and 24 months after the first NIVO dose, OS rates were 93.2 and 79.4%, respectively | Relapses occurred among patients with non-pCR/MPR, suggesting that a period of postoperative anti-PD-1 may be appropriate only for some | (56) |
| Pavel (2024)    | 57 | 65.0 (39-82) | 57.9% | <i>Population:</i> Adults with advanced NETs<br><i>Intervention:</i> LAN plus TMZ<br><i>Comparison:</i> Placebo or other systemic therapy                                                                                         | Pancreatic, Small intestinal, colorectal | NETs                  | LAN plus TMZ | LAN 120 mg/4 weeks with TMZ for the first six months. TMZ was administered for five                                                      | LAN plus TMZ is a treatment option for patients with progressive GEP-NET with a more aggressive biological profile showing a                                                                | At 12 months of follow-up, median PFS was 11.1 months                                                                                           | Small sample size; lack of randomization into the combination vs. monotherapy of TMZ                                                    | (57) |

|                      |    |              |       |                                                                                                                                                                                                                                                                                                                                         |                                                                                                                                               |                     |                            |                                                                                                                                                                                                                     |                                                                                                                                                                                                                                      |                                                                                                    |                                                                                                                                        |      |
|----------------------|----|--------------|-------|-----------------------------------------------------------------------------------------------------------------------------------------------------------------------------------------------------------------------------------------------------------------------------------------------------------------------------------------|-----------------------------------------------------------------------------------------------------------------------------------------------|---------------------|----------------------------|---------------------------------------------------------------------------------------------------------------------------------------------------------------------------------------------------------------------|--------------------------------------------------------------------------------------------------------------------------------------------------------------------------------------------------------------------------------------|----------------------------------------------------------------------------------------------------|----------------------------------------------------------------------------------------------------------------------------------------|------|
|                      |    |              |       | <i>Outcome:</i> Tumour response rate, PFS                                                                                                                                                                                                                                                                                               |                                                                                                                                               |                     |                            | consecutive days every 28 days at 150 mg/m <sup>2</sup> /day for one month, then increased to 200 mg/m <sup>2</sup> /day                                                                                            | manageable safety profile                                                                                                                                                                                                            |                                                                                                    | treatment; subgroup analyses resulted in small patient numbers, and hence, these data may only be interpreted as explorative           |      |
| Leidner (2023)       | 83 | 63 (28, 85)  | 56.6% | <i>Population:</i> Patients with advanced solid tumours<br><i>Intervention:</i> Monotherapy with single-agent NIZ985<br><i>Comparison:</i> With NIZ985 TIW or QW plus spartalizumab<br><i>Outcome:</i> To assess the safety and tolerability of single-agent NIZ985 and NIZ985/natalizumab and to establish the maximum tolerated doses | Colon, pancreas, kidney, ovary, skin melanoma, bone, breast, eye, head and neck, liver, parotid gland, prostate, soft tissue, testis, thyroid | Advanced solid NETs | Monotherapy or combination | Single-agent NIZ985 administered subcutaneously twice weekly, two weeks on/2 weeks off, or once weekly, and NIZ985 TIW or QW administered subcutaneously plus spartalizumab (400 mg intravenously every four weeks) | NIZ985 was well tolerated in the single-agent and NIZ985/natalizumab regimens. The RDE was established at 1 µg/kg TIW. The combination's antitumour activity was observed against tumour types known to have a poor response to ICIs | Median PFS was 1.9 months in the PD-1-sensitive cohort and 1.6 months in the PD-1-resistant cohort | The study was limited only to solid tumours, not haematological malignancies. Also, more research is needed to reach stage conclusions | (58) |
| Reidy-Lagunes (2019) | 20 | 57.5 (22-73) | 50%   | <i>Population:</i> Patients with advanced SSTR2 positive NETs                                                                                                                                                                                                                                                                           | Lung, small bowel, pancreatic, gastric, rectal, kidney                                                                                        | NETs                | Lu-satoreotide tetraxetan  | Three months each cycle                                                                                                                                                                                             | Lu-satoreotide tetraxetan can deliver high radiation doses to NETs with favourable tumour-                                                                                                                                           | Median PFS was 21.0 months; two-year OS was                                                        | The initial treatment schedule of this trial was associated with more severe                                                           | (59) |

|             |    |            |     |                                                                                                                                                                                                                                                                              |                        |                                            |            |                                                                                                                       |                                                                                                                                                                                                           |                                                                      |                                                                                                                                                                                                        |      |
|-------------|----|------------|-----|------------------------------------------------------------------------------------------------------------------------------------------------------------------------------------------------------------------------------------------------------------------------------|------------------------|--------------------------------------------|------------|-----------------------------------------------------------------------------------------------------------------------|-----------------------------------------------------------------------------------------------------------------------------------------------------------------------------------------------------------|----------------------------------------------------------------------|--------------------------------------------------------------------------------------------------------------------------------------------------------------------------------------------------------|------|
|             |    |            |     | <p><i>Intervention:</i> Lu-satoreotide tetraxetan</p> <p><i>Comparison:</i> Placebo</p> <p><i>Outcome:</i> Progression-free survival, overall survival</p>                                                                                                                   |                        |                                            |            |                                                                                                                       | <p>to-normal organ dose ratios. Preliminary data on tumour response rates and PFS are encouraging and support a potential therapeutic role for radiolabeled somatostatin antagonists in treating NETs</p> | <p>85%, and three-year OS was 63%</p>                                | <p>hepatotoxicity than expected from SSSTR2 agonists at the same or higher red marrow dose; extensive delay in treating a subgroup of patients with the second therapeutic dose, small sample size</p> |      |
| Iyer (2020) | 32 | 65 (45-77) | 53% | <p><i>Population:</i> Patients with advanced, grade 1-2 non-pancreatic NETs on a stable dose of somatostatin analogue</p> <p><i>Intervention:</i> Nintedanib</p> <p><i>Comparison:</i> Placebo</p> <p><i>Outcome:</i> To determine the antitumour efficacy of nintedanib</p> | Gastrointestinal tract | Non-functional gastroenteropancreatic NETs | Nintedanib | Dose of 200 mg twice daily in 28-day cycles; treatment was continued until disease progression, unacceptable toxicity | Nintedanib, in combination with octreotide LAR, showed activity in patients with advanced, pretreated, non-pancreatic NETs and had a manageable toxicity profile                                          | The median PFS and OS were 11.0 months and 32.7 months, respectively | The authors cannot exclude any confounding effect of prior everolimus use. The small sample size and the number of patients with prior everolimus use preclude any meaningful comparisons              | (60) |

|              |     |                  |       |                                                                                                                                                                                                                                                                                                         |                                                                    |                                                   |                                                                                                                             |                                                                                               |                                                                                                                                                                                                    |                                                                                                                                 |                                                                                                                                                                |      |
|--------------|-----|------------------|-------|---------------------------------------------------------------------------------------------------------------------------------------------------------------------------------------------------------------------------------------------------------------------------------------------------------|--------------------------------------------------------------------|---------------------------------------------------|-----------------------------------------------------------------------------------------------------------------------------|-----------------------------------------------------------------------------------------------|----------------------------------------------------------------------------------------------------------------------------------------------------------------------------------------------------|---------------------------------------------------------------------------------------------------------------------------------|----------------------------------------------------------------------------------------------------------------------------------------------------------------|------|
| Rinke (2021) | 79  | 65.7 (62.9-68.5) | 54.4% | <i>Population:</i> Patients with neuroendocrine tumours<br><i>Intervention:</i> LAN<br><i>Comparison:</i> Single-agent checkpoint inhibition<br><i>Outcome:</i> To evaluate the long-term treatment response in patients with neuroendocrine tumours                                                    | Intestine, pancreas                                                | NETs                                              | 45.6% of patients were administered LAN at a starting dose of 60 mg, 26.6% at a dose of 90 mg and 27.8% at a dose of 120 mg | Every four weeks for 24 months                                                                | Dual checkpoint inhibition showed enhanced efficacy compared to single-agent therapy                                                                                                               | Overall tolerability of treatment was judged as 'very good' or 'good' by 94.6% at month 12 and by 83.3% of patients at month 24 | The treating physician made all decisions concerning diagnosis and treatment; the high dropout rate was mainly due to the decreasing efficacy of treatment     | (61) |
| Singh, 2024  | 226 | 61 (51-70)       | 54%   | <i>Population:</i> Adults ≥15 years, newly diagnosed advanced grade 2-3, well-differentiated, SSTR+ GEP-NETs<br><i>Intervention:</i> ( <sup>177</sup> Lu)Lu-DOTA-TATE + octreotide 30 mg LAR;<br><i>Comparison:</i> High-dose octreotide 60 mg LAR; <i>Outcome:</i> PFS (primary), ORR, OS, QoL, safety | Pancreas 54%, small intestine 29%, rectum 5%, stomach 4%, other 7% | Grade 2 (65%), Grade 3 (35%), well-differentiated | Arm A: <sup>177</sup> Lu-Dotatate IV q8w x4 cycles + octreotide 30 mg LAR; Arm B: octreotide 60 mg LAR q4w                  | Median exposure 71.1 weeks (Lu-Dotatate) vs. 40.3 weeks (control); 88% completed all 4 cycles | Median PFS 22.8 months vs. 8.5 months (HR 0.28, P<0.0001); ORR 43% vs. 9%; durable responses (median DoR 23.3 months); QoL maintained; manageable safety (grade ≥3 AEs 35% vs. 27%); 1 case of MDS | OS not yet mature; 6-months PFS 78% vs 59%; high DCR 90.7% vs. 66.7%                                                            | Open-label design; central pathology not mandated (local Ki67); crossover from control to Lu-Dotatate confounded OS; immature OS; limited adolescent inclusion | (62) |

SCLC, small cell lung cancer; NIVO, nivolumab; SUN, sunitinib; IPI, ipilimumab; IHC, immunohistochemistry; DLL3, delta-like protein 3; CRPC-NE, castration-resistant prostate cancer with neuroendocrine differentiation; DCI, dual checkpoint inhibition; VHL, Von Hippel-Lindau; EP, etoposide plus cisplatin; IP, irinotecan plus cisplatin; TCC, transitional cell carcinoma; SCLC, small cell lung cancer; SCCHN, squamous cell carcinoma of the head and neck;

GI, gastrointestinal; CAPTEM, capecitabine and temozolomide; MCC, Merkel cell carcinoma; LAN, lanreotide; TMZ, temozolomide; GEP-NET, gastroenteropancreatic neuroendocrine tumour; SSTR2, somatostatin receptor type 2; LAR, long-acting release; LAN lanreotide autogel; OS, overall survival; PFS, progression-free survival; DCR, disease control rate; ORR, objective response rate; QoL, quality of life.
